# Supplementary material for: A strongly coupled oxide-support heterostructure for efficient acidic water oxidation
Source: Royal Society of Chemistry journal article supplement (doi:10.1039/d4cc04262j), 2024-01-01
Supplement: d4cc04262j1.pdf [file d4cc04262j1.pdf]

## Supporting Information

### **A strongly coupled oxide-support heterostructure for efficient acidic water oxidation**

Hongjun Chen,<sup>a</sup> Liming Deng,<sup>a</sup> Shuyi Liu,<sup>a</sup> Feng Hu,<sup>\*a</sup> Linlin Li,<sup>\*a</sup> Jianwei Ren<sup>c</sup> and Shengjie Peng<sup>\*ab</sup>

<sup>a</sup> College of Materials Science and Technology, Nanjing University of Aeronautics and Astronautics, Nanjing 210016, China

E-mail: fenghu@nuaa.edu.cn (Feng Hu), lilinlin@nuaa.edu.cn (Linlin Li), pengshengjie@nuaa.edu.cn (Shengjie Peng)

<sup>b</sup> State Key Laboratory of High Performance Ceramics and Superfine Microstructure, Shanghai 200050, China

<sup>c</sup> Department of Chemical Engineering, University of Pretoria, cnr Lynnwood Road and Roper Street, Hatfield 0028, South Africa

Email: jianwei.ren@up.ac.za (Jianwei Ren)

## **1. Experimental Section**

### **1.1 Materials**

Manganese chloride tetrahydrate ( $\text{MnCl}_2 \cdot 4\text{H}_2\text{O}$ , 99%), cobalt chloride hexahydrate ( $\text{CoCl}_2 \cdot 6\text{H}_2\text{O}$ , 99.7%), carbamide ( $(\text{NH}_2)_2\text{CO}$ , 99%), ruthenium trichloride ( $\text{RuCl}_3$ , 99.9%), and polyvinylidene fluoride (PVDF, 99%) were obtained from Aladdin (Shanghai, China).

### **1.2 Synthesis of $\text{MnCo}_2\text{O}_{4.5}$**

198 mg of  $\text{MnCl}_2 \cdot 4\text{H}_2\text{O}$ , 600 mg of carbamide, and 476 mg of  $\text{CoCl}_2 \cdot 6\text{H}_2\text{O}$  were evenly dispersed in 40 mL of deionized water. After stirring the solution thoroughly, the solution was transferred to an autoclave. Then, the autoclave was placed in an oven and reacted at  $120^\circ\text{C}$  for 16 h. Subsequently, the  $\text{MnCo}(\text{OH})_x$  product was rinsed with deionized water and anhydrous ethanol multiple times, and dried in a vacuum-drying oven at  $60^\circ\text{C}$ . Finally, the  $\text{MnCo}(\text{OH})_x$  was calcined in a muffle furnace at  $400^\circ\text{C}$  for 3 h to obtain  $\text{MnCo}_2\text{O}_{4.5}$  powder.

### **1.3 Synthesis of $\text{RuO}_2/\text{MnCo}_2\text{O}_{4.5}$**

40 mg of  $\text{RuCl}_3$  and 40 mg of  $\text{MnCo}_2\text{O}_{4.5}$  were evenly dispersed in 30 mL of deionized water and stirred thoroughly for 2 h. The mixed solution was rinsed with deionized water and anhydrous ethanol alternately, and dried in a vacuum-drying oven at  $60^\circ\text{C}$  to obtain the  $\text{RuO}_2/\text{MnCo}_2\text{O}_{4.5}$  precursor powder. The  $\text{RuO}_2/\text{MnCo}_2\text{O}_{4.5}$  was calcined in a muffle furnace at  $350^\circ\text{C}$  for 3 h.  $\text{RuO}_2/\text{MnCo}_2\text{O}_{4.5}$ -1,  $\text{RuO}_2/\text{MnCo}_2\text{O}_{4.5}$ -2 were prepared with the different mass ratios of  $\text{RuCl}_3$  to  $\text{MnCo}_2\text{O}_{4.5}$  as 1:2 and 3:2, respectively.

### **1.4 Characterization**

X-ray diffraction (XRD) data acquired from the Bruker D8 advance (Billerica) with a guaranteed scanning rate of  $10^\circ \text{min}^{-1}$  was used to explore the crystal structure. The morphology and microstructure observations were made using a scanning electron microscope (SEM, Regulus 8100). Transmission electron

microscope (TEM) data was obtained on FEI Tecnai G2 F20. The valence state of the catalyst was measured and analyzed by X-ray photoelectron spectrometer (XPS Escalab 250Xi). Electron paramagnetic resonance (EPR) tests were performed using the EMX-6/1 instrument to indentify the oxygen vacancies. The extended X-ray absorption fine structure (EXAFS) was measured at the Beijing Photon Source (easyXAFS300, easyXAFS LLC) beamline. In-situ Raman spectroscopy were collected on a confocal Raman spectroscopy system, which is constructed by the SmartRaman confocal module and the HORIBA iHR550 spectrometer, with a 532 nm laser wavelength and a 50× long-focus microscope lens. In situ Raman spectroscopy measurements were conducted in a custom flow-type in situ Raman electrochemical cell. Before the experiment, the Raman spectroscopy system was calibrated using a standard silicon wafer (520.7 cm<sup>-1</sup>).

### **1.5 Electrochemical measurements**

The catalyst, conductive agent (carbon black), and binder (polyvinylidene fluoride, PVDF) were mixed at a mass ratio of 7:2:1 to obtain the catalyst paste. The working electrode was made by coating the slurry on 1×1 cm<sup>2</sup> nickel foam. A standard three-electrode system was used to test the electrocatalytic activity of the catalyst at the Electrochemical Workstation (Autolab Instrument). The prepared catalyst was used as the working electrode, graphite rod was used as the counter electrode (CE), and a KCl-saturated Ag/AgCl electrode was used as the reference electrode (RE) for the HER tests. All potentials in the work reported were converted relative to the reversible hydrogen electrode (RHE) according to the Nernst equation ( $E_{\text{RHE}} = E_{\text{Ag/AgCl}} + 0.197 + 0.0591 \times \text{pH}$ ). Polarization curves were measured by linear sweep voltammetry (LSV) at a scan rate of 5 mV s<sup>-1</sup> and compensated using iR. Electrochemical surface area (ECSA) was obtained by measuring capacitance at scan rates of 20~140 mV s<sup>-1</sup>. The electrochemical impedance spectroscopy (EIS) was conducted over the frequency range of 0.01~10<sup>5</sup> kHz with an amplitude of 10 mV.

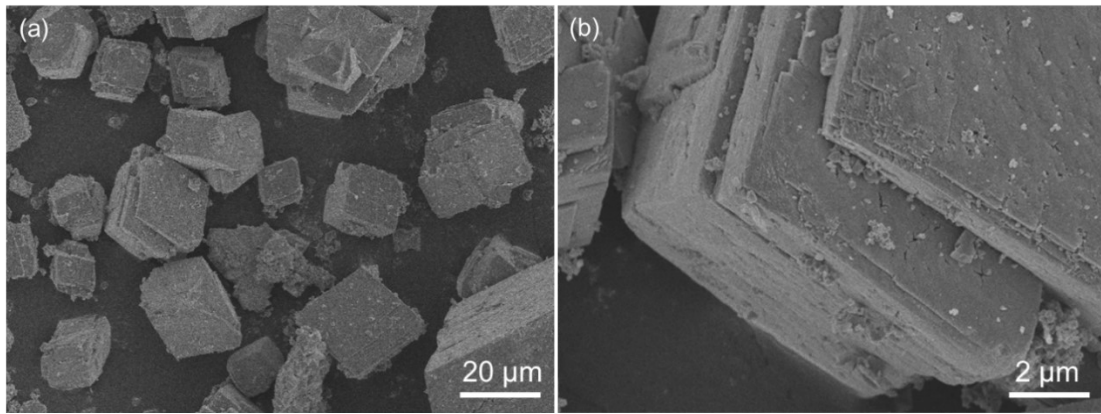

**Fig. S1** (a) High-power; (b) low-power SEM images of MnCo<sub>2</sub>O<sub>4.5</sub>.

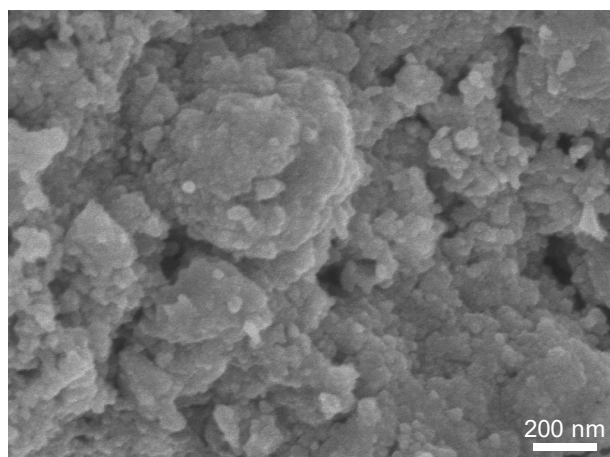

**Fig. S2** SEM image of RuO<sub>2</sub>/MnCo<sub>2</sub>O<sub>4.5</sub>.

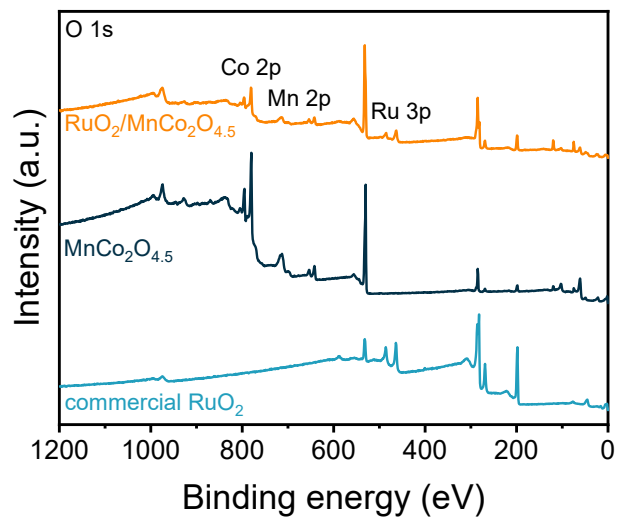

**Fig. S3** The wide XPS wide-scan for RuO<sub>2</sub>/MnCo<sub>2</sub>O<sub>4.5</sub>, MnCo<sub>2</sub>O<sub>4.5</sub> and commercial RuO<sub>2</sub>, respectively.

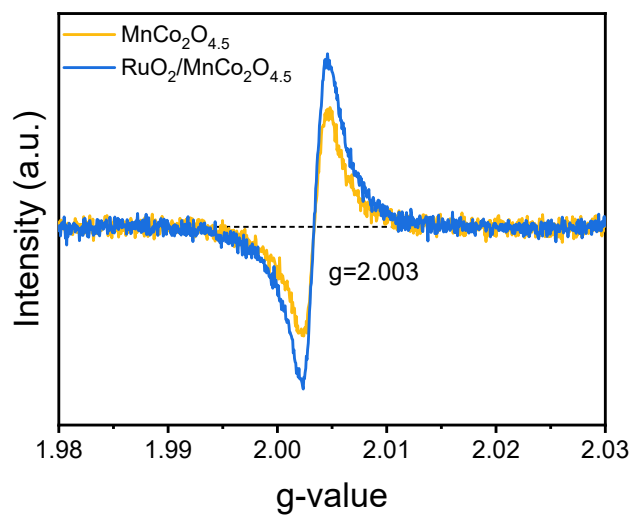

**Fig. S4** EPR spectra of  $\text{MnCo}_2\text{O}_{4.5}$  and  $\text{RuO}_2/\text{MnCo}_2\text{O}_{4.5}$ , respectively.

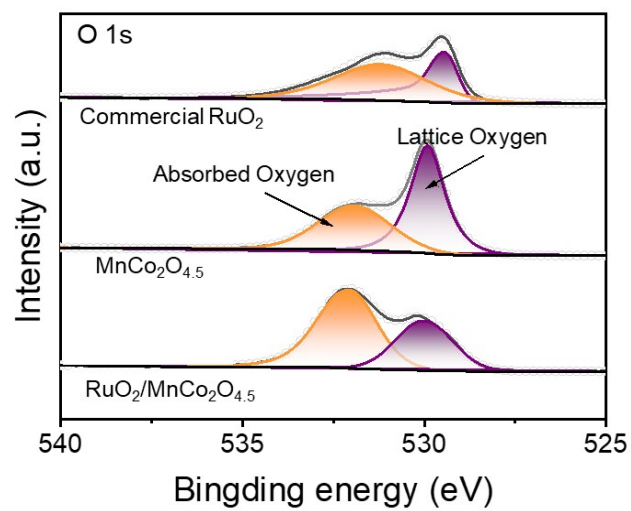

**Fig. S5** O 1s XPS spectra of RuO<sub>2</sub>/MnCo<sub>2</sub>O<sub>4.5</sub>, MnCo<sub>2</sub>O<sub>4.5</sub> and commercial RuO<sub>2</sub>, respectively.



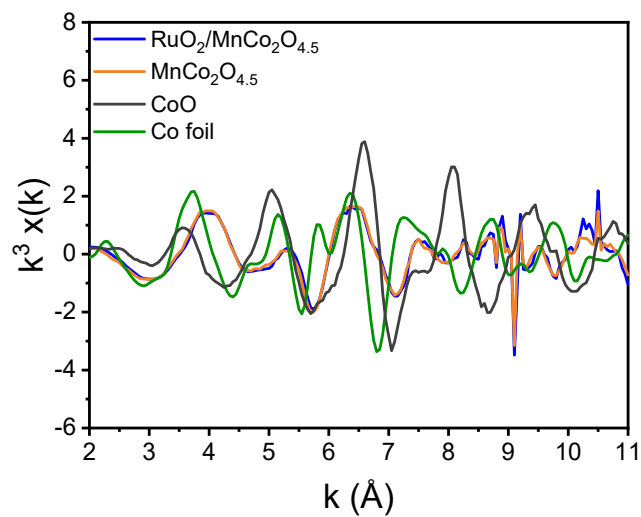

**Fig. S6** Co K-edge EXAFS oscillation function of Co foil, CoO,  $\text{MnCo}_2\text{O}_{4.5}$  and  $\text{RuO}_2/\text{MnCo}_2\text{O}_{4.5}$ , respectively.

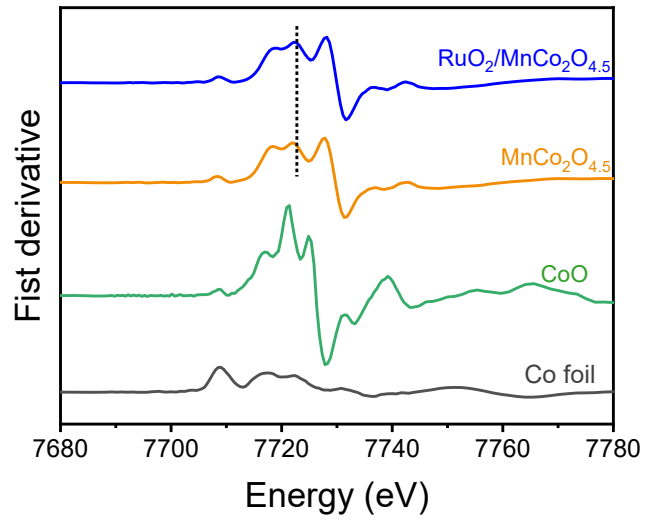

**Fig. S7** The first derivative spectra of Co foil, CoO, MnCo<sub>2</sub>O<sub>4.5</sub> and RuO<sub>2</sub>/MnCo<sub>2</sub>O<sub>4.5</sub>, respectively.

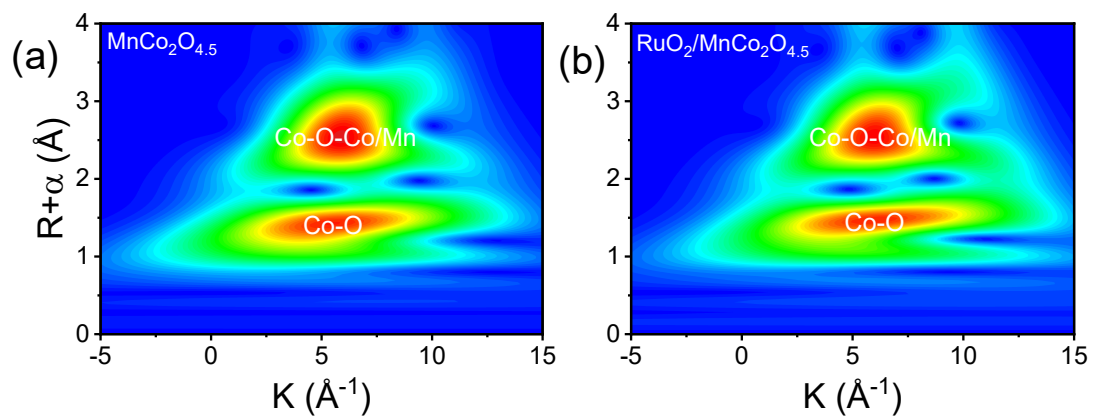

**Fig. S8** WT of the Co K-edge for  $\text{MnCo}_2\text{O}_{4.5}$  and  $\text{RuO}_2/\text{MnCo}_2\text{O}_{4.5}$ , respectively.

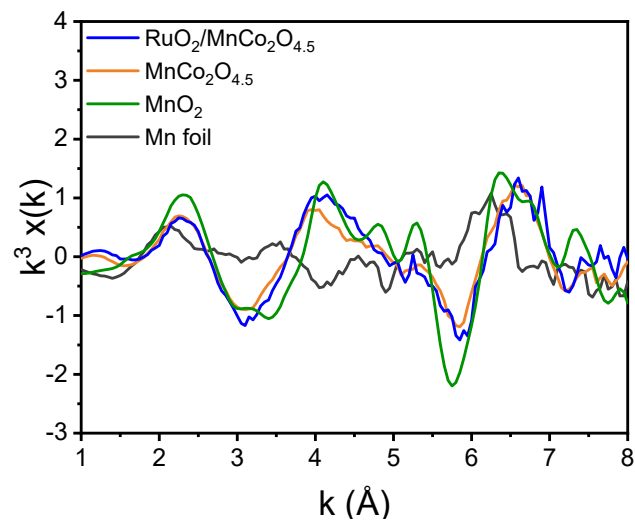

**Fig. S9** Mn K-edge EXAFS oscillation function of Mn foil,  $\text{MnO}_2$ ,  $\text{MnCo}_2\text{O}_{4.5}$  and  $\text{RuO}_2/\text{MnCo}_2\text{O}_{4.5}$ , respectively.

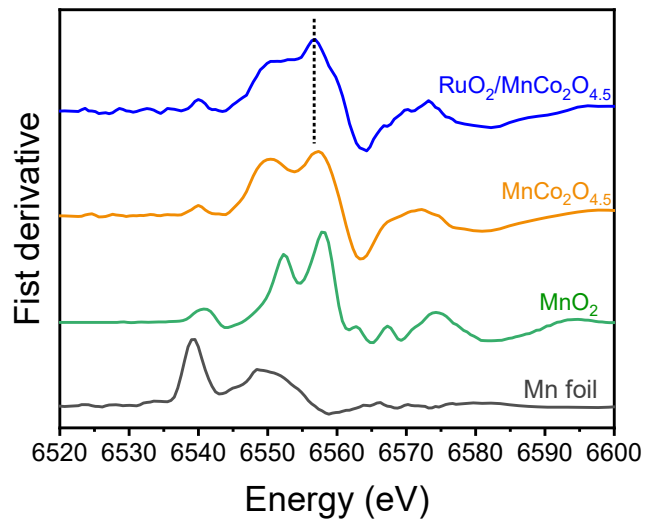

**Fig. S10** The first derivative spectra of Mn foil, MnO<sub>2</sub>, MnCo<sub>2</sub>O<sub>4.5</sub> and RuO<sub>2</sub>/MnCo<sub>2</sub>O<sub>4.5</sub>, respectively.

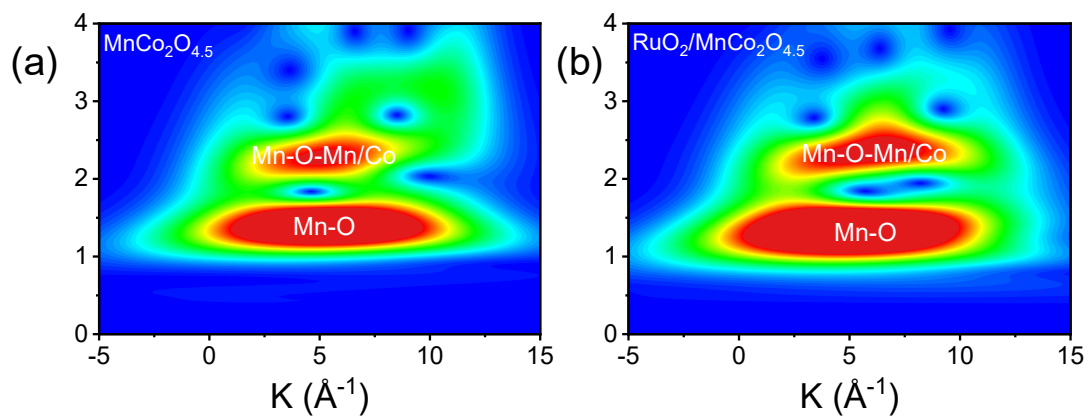

**Fig. S11** WT of the Mn K-edge for  $\text{MnCo}_2\text{O}_{4.5}$  and  $\text{RuO}_2/\text{MnCo}_2\text{O}_{4.5}$ , respectively.

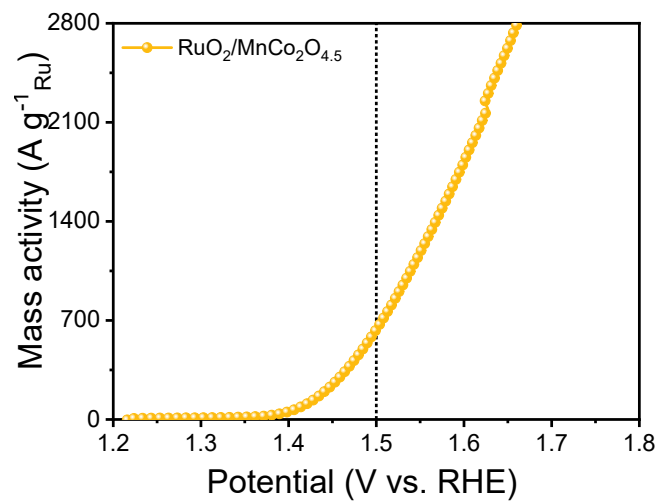

**Fig. S12** The Ru mass normalized LSV curves of RuO<sub>2</sub>/MnCo<sub>2</sub>O<sub>4.5</sub>.

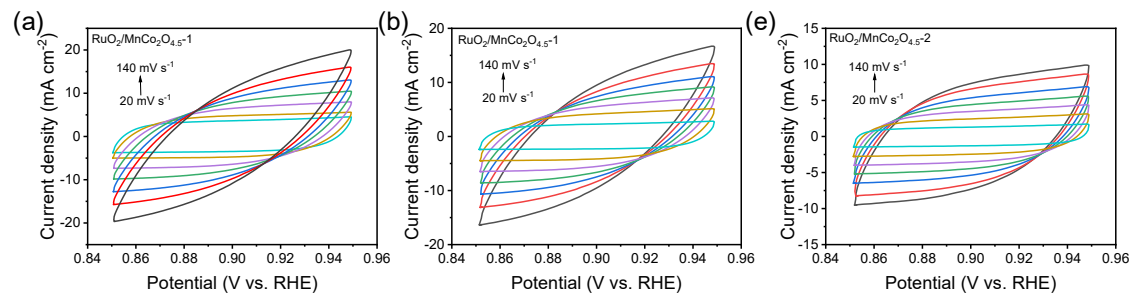

**Fig. S13** The CV curves of (a)  $\text{RuO}_2/\text{MnCo}_2\text{O}_{4.5}$ , (b)  $\text{RuO}_2/\text{MnCo}_2\text{O}_{4.5-1}$ , and (c)  $\text{RuO}_2/\text{MnCo}_2\text{O}_{4.5-2}$  at various scan rates, respectively.



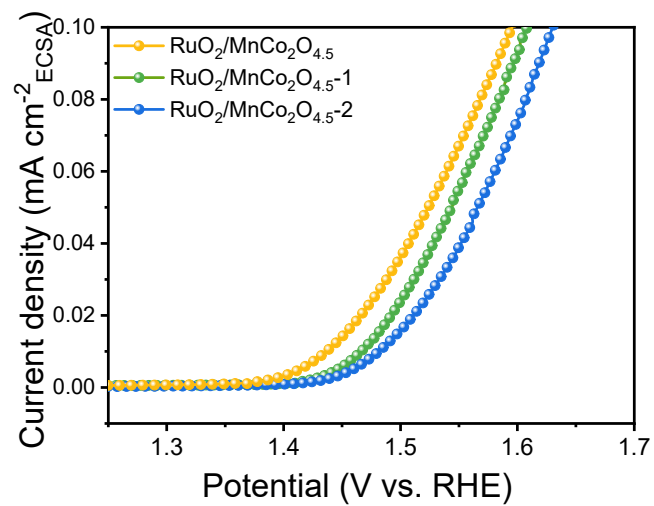

**Fig. S14** The OER polarization curves normalized by the ECSA for RuO<sub>2</sub>/MnCo<sub>2</sub>O<sub>4.5</sub>, RuO<sub>2</sub>/MnCo<sub>2</sub>O<sub>4.5</sub>-1, and RuO<sub>2</sub>/MnCo<sub>2</sub>O<sub>4.5</sub>-2.

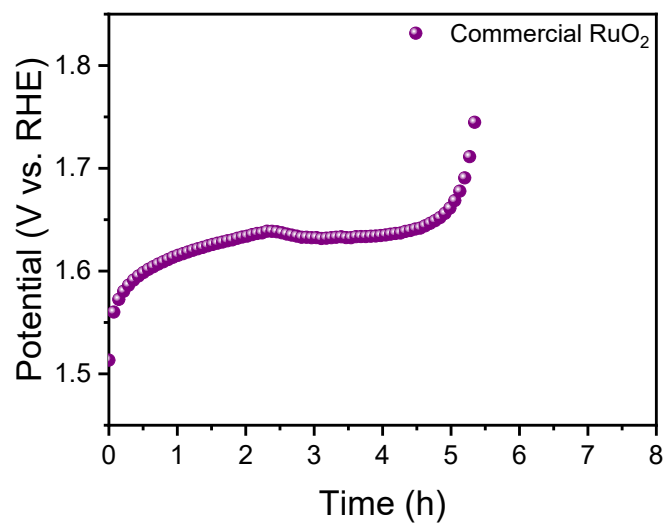

**Fig. S15** Stability diagram of commercial RuO<sub>2</sub> in a three-electrode system.

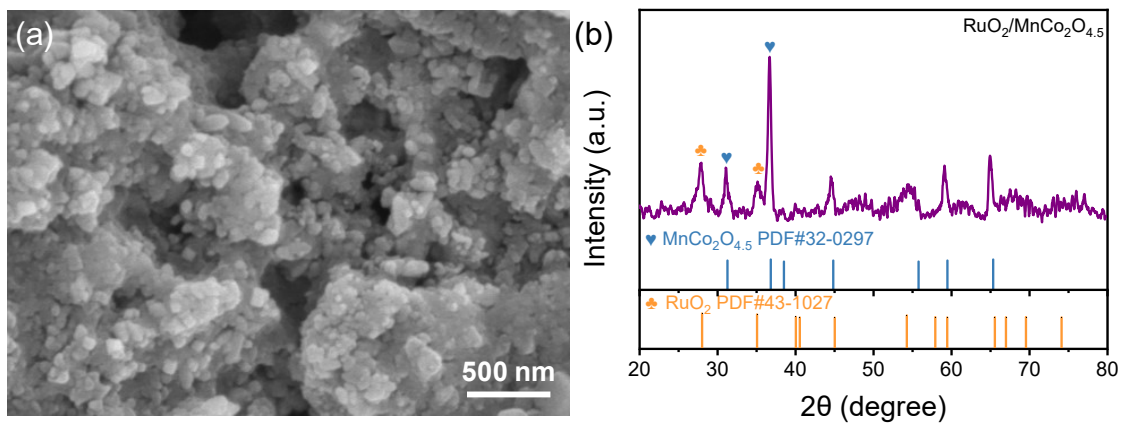

**Fig. S16** (a) SEM, and (b) XRD images of RuO<sub>2</sub>/MnCo<sub>2</sub>O<sub>4.5</sub> after OER test.

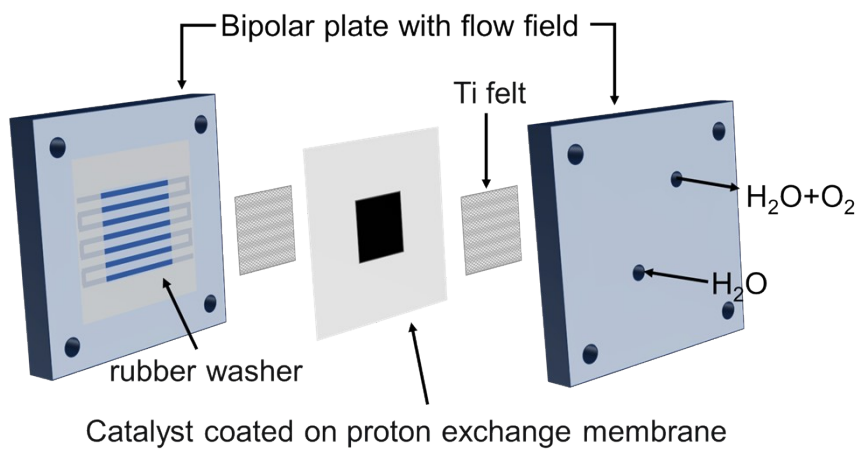

**Fig. S17** Schematic diagram of the composition of the PEM electrolyzer.

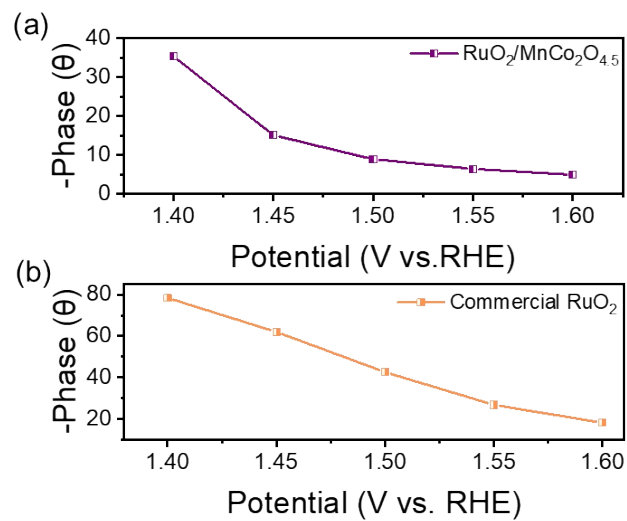

**Fig. S18** Response of the  $R_{ct}$  charge transfer resistance to the applied potential of (a)  $RuO_2/MnCo_2O_{4.5}$  and (b) commercial  $RuO_2$ .

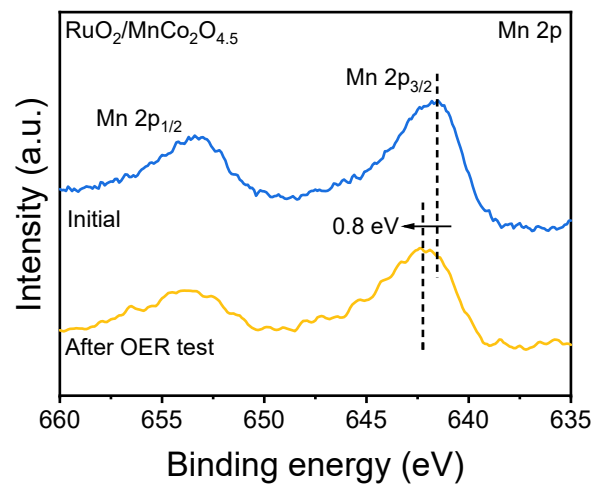

**Fig. S19** Mn 2p XPS spectra of RuO<sub>2</sub>/MnCo<sub>2</sub>O<sub>4.5</sub> before and after OER test.

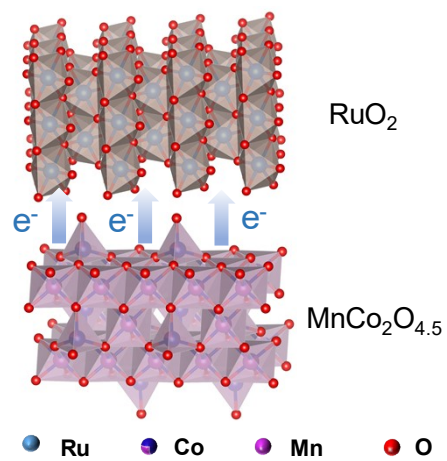

**Fig. S20** Schematic illustrations of the electron supply effect in  $\text{RuO}_2/\text{MnCo}_2\text{O}_{4.5}$ .

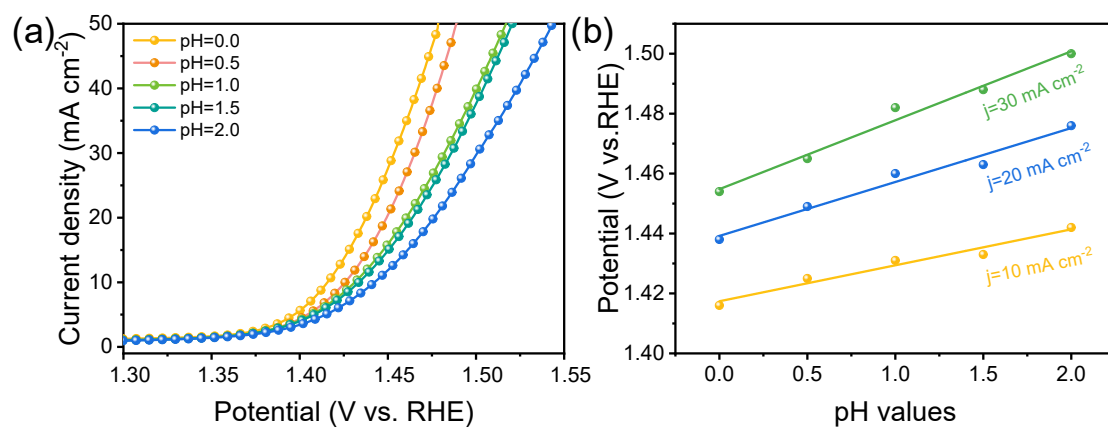

**Fig. S21** (a) LSV curves of RuO<sub>2</sub>/MnCo<sub>2</sub>O<sub>4.5</sub> in electrolytes of different pH values. (b) pH dependence on the OER potential at 10, 20, and 30 mA cm<sup>-2</sup> for RuO<sub>2</sub>/MnCo<sub>2</sub>O<sub>4.5</sub>.



**Table S1.** Comparison table of overpotential and stability of different Ru-based catalysts in acidic electrolyte.

| Catalyst                                                  | Overpotential<br>@10mA cm <sup>-2</sup> | Stability(h) | Reference                                         |
|-----------------------------------------------------------|-----------------------------------------|--------------|---------------------------------------------------|
| <b>RuO<sub>2</sub>/MnCo<sub>2</sub>O<sub>4.5</sub></b>    | <b>190</b>                              | <b>150</b>   | <b>This Work</b>                                  |
| Ru@V-RuO <sub>2</sub> /C HMS                              | 237                                     | 15           | Adv. Mater. 2023, 35, e2206351                    |
| Ru/Se/RuO <sub>2</sub>                                    | 190                                     | 24           | Adv. Funct. Mater., 2023, 33, 2211102             |
| 2D-RuO <sub>2</sub> /G                                    | 169                                     | /            | Nano Energy, 2020, 78, 105185                     |
| 1D-RuO <sub>2</sub> -CN <sub>x</sub>                      | 250                                     | 50           | ACS Appl. Mater. Inter., 2016. 8. 28678-28688     |
| RuO <sub>2</sub> /D-TiO <sub>2</sub>                      | 180                                     | 30           | ACS Catal., 2022, 12, 9437-9445                   |
| s-RuO <sub>2</sub> /ATO                                   | 198                                     | 12           | Adv. Sci., 2022, 9, 2201654                       |
| H/d-MnO <sub>x</sub> /RuO <sub>2</sub>                    | 178                                     | 40           | Adv. Funct. Mater., 2023, 33, 2307010             |
| RuO <sub>2</sub> -WC NPs                                  | 347                                     | 10           | Angew. Chem. Int. Ed. Engl., 2022, 61, e202202519 |
| CoO <sub>x</sub> /RuO <sub>x</sub> -CC                    | 180                                     | 60           | Small, 2023, 19, e2302238                         |
| Ru <sub>0.6</sub> Cr <sub>0.4</sub> O <sub>2</sub>        | 195                                     | 20           | Small Methods, 2022, 6. 2200636                   |
| RuO <sub>2</sub> /(Co,Mn) <sub>3</sub> O <sub>4</sub> /CC | 270                                     | 24           | Appl. Catal. B Environ., 2021, 297, 120442        |
| RuB <sub>2</sub>                                          | 223                                     | 10           | ACS Energy Lett., 2020, 5, 2909                   |

**Table S2.** Comparison table of mass activity of different Ru-based catalysts in acidic electrolyte.

| Catalyst                                                  | Mass activity<br>(A g <sup>-1</sup> )     | Reference                                         |
|-----------------------------------------------------------|-------------------------------------------|---------------------------------------------------|
| <b>RuO<sub>2</sub>/MnCo<sub>2</sub>O<sub>4.5</sub></b>    | <b>636@270 mV</b><br><b>1515.7@347 mV</b> | <b>This Work</b>                                  |
| Cr <sub>0.6</sub> Ru <sub>0.4</sub> O <sub>2</sub> (550)  | 229@270 mV                                | Nat. Commun., 2019, 10, 162                       |
| RuO <sub>2</sub> -WC NPs                                  | 1430@347 mV                               | Angew. Chem. Int. Ed. Engl., 2022, 61, e202202519 |
| Ru <sub>0.6</sub> Cr <sub>0.4</sub> O <sub>2</sub>        | 46.71@270 mV                              | Small Methods, 2022, 6, 2200636                   |
| RuO <sub>2</sub> /SnO <sub>2</sub> -xX                    | 115.2@200 mV                              | Small, 2023, 19, 2301516                          |
| Re <sub>0.06</sub> Ru <sub>0.94</sub> O <sub>2</sub>      | 500@272 mV                                | Nat. Commun., 2023, 14, 354                       |
| py-RuO <sub>2</sub> :Zn                                   | 100@212 mV<br>800@300 mV                  | Nat. Commun., 2023, 14, 2517                      |
| RuO <sub>2</sub> /MnO <sub>2</sub> /CC                    | 229.67@250 mV                             | Small, 2024, 20, 2310464                          |
| RuO <sub>2</sub> /(Co,Mn) <sub>3</sub> O <sub>4</sub> /CC | 366.5@300 mV                              | Appl. Catal. B Environ., 2021, 297, 120442        |

**Table S3.** Comparison table of overpotential and stability of different Ru-based catalysts in acidic PEMWE.

| Catalyst                                                              | Potential (V)                                                             | Stability (h)                               | Reference                                          |
|-----------------------------------------------------------------------|---------------------------------------------------------------------------|---------------------------------------------|----------------------------------------------------|
| <b>RuO<sub>2</sub>/MnCo<sub>2</sub>O<sub>4.5</sub></b>                | <b>1.76@500 mA cm<sup>-2</sup></b><br><b>1.98@1000 mA cm<sup>-2</sup></b> | <b>50</b><br><b>@200 mA cm<sup>-2</sup></b> | <b>This Work</b>                                   |
| W <sub>0.2</sub> Er <sub>0.1</sub> Ru <sub>0.7</sub> O <sub>2-δ</sub> | /                                                                         | 120<br>@100 mA cm <sup>-2</sup>             | Nat. Commun.,<br>2020, 11. 5368                    |
| Nd <sub>0.1</sub> RuO <sub>x</sub> /CC                                | 1.595@50 mA cm <sup>-2</sup>                                              | 50<br>@10 mA cm <sup>-2</sup>               | Adv. Funct.<br>Mater., 2023, 33.<br>2213304        |
| PtCo–RuO <sub>2</sub> /C,                                             | 1.6@1000 mA cm <sup>-2</sup>                                              | 24<br>@1000 mA cm <sup>-2</sup>             | Energ Environ<br>Sci., 2022, 15,<br>1119-1130      |
| SS Pt-RuO <sub>2</sub> HNSs                                           | /                                                                         | 100<br>@100 mA cm <sup>-2</sup>             | Sci. Adv., 2022, 8,<br>9271                        |
| RuO <sub>2</sub> /SnO <sub>2</sub> -1.5X                              | 1.52@500 mA cm <sup>-2</sup><br>1.6@1000 mA cm <sup>-2</sup>              | 30<br>@500 mA cm <sup>-2</sup>              | Small, 2023, 19.<br>2301516                        |
| Ru <sub>0.6</sub> Cr <sub>0.4</sub> O <sub>2</sub>                    | /                                                                         | 12<br>@100 mA cm <sup>-2</sup>              | Small Methods,<br>2022, 6. 2200636                 |
| a/c-RuO <sub>2</sub>                                                  | 1.52@10 mA cm <sup>-2</sup>                                               | 20<br>@50 mA cm <sup>-2</sup>               | Angew. Chem.<br>Int. Ed., 2021, 60,<br>18821-18829 |
| CoO <sub>x</sub> /RuO <sub>x</sub> -CC                                | 1.64@100 mA cm <sup>-2</sup>                                              | 100<br>@100 mA cm <sup>-2</sup>             | Small, 2023, 19,<br>e2302238                       |
| Ir-MnO <sub>2</sub> (160)-CC                                          | 1.65@100 mA cm <sup>-2</sup>                                              | 70<br>@100 mA cm <sup>-2</sup>              | Adv. Sci., 2023,<br>2205920                        |
